# Supplementary material for: Suspected Lynch syndrome associated MSH6 variants: A functional assay to determine their pathogenicity
Source: PubMed Central journal article supplement (PMC5460888; doi:10.1371/journal.pgen.1006765), 2017-05-22
Supplement: pgen.1006765.s001.pdf [file pgen.1006765.s001.pdf]

Human: 1-MSRQSTLYSFFPKSPALSDANKASARASREGGRAAAPPASPSPGDAAWSEAGPGRPLARSASPPKAKNLNGGLRRSVAPAA PTSCDFSPGDLVWAKM  
Mouse: 1-MSRQSTLYSFFPKSPALGDTTKAAAEASRQG AAASCASASRGDAAWSEAEPSRSAAVSASSPEAKDLNGGLRRASSAQAVPPSSCDFSPGDLVWAKM  
\* \*\* \* \* \* \* \* \* \* \* \* \* \* \* \* \* \* \* \* \* \*

Human: 101-EGYPWWPCLVYNHFPDGTFFIREKGSVRVHVQFFDDSPTRGWVSKRLLKPYTGSKSKEAQKGGHFYSKPEILRAMQRADALNKDKIKRLELAVCDEPS  
Mouse: 101-EGYPWWPCLVYNHFPDGTFFIRKKGSVRVHVQFFDDSPTRGWVSKRMLKPYTGSKSKEAQKGGHFYSKPEILRAMQRADALSQDAERLQAVCDEPS  
\* \* \* \* \* \* \* \* \* \* \* \* \* \* \* \* \* \* \*

Human: 201-EPEEEEEMEVGTYYVTDKSEEDNEIESEEEVQPKTQGSRRSSRQIKRRRVIDSDESIDIGSDVEFKPDTKEEGSSDEISSGVGDSESEGLNSPVKVARKR  
Mouse: 201-EPEEEEETEVHEAYLSDKSEEDNYNESEEEAQPVSQGPSSRQVKKRRVIDSDESIDIGSDVEFKPDTKEGSSDDASSGVGDSESEDLGTFGK GAPKR  
\* \*\* \* \* \* \* \* \* \* \* \* \* \* \* \* \* \* \* \* \* \*

Human: 301-KRMVTGNGLKRRKSSRKETPSATKQATSISSETKNTLRAFSAPQNSSESQAHVSGGGDDSSRPTVWYHETLEWLKKEKRRDEHRRRPHDPDFDASTLYVPE  
Mouse: 301-KRAMVAQGLRRLKSLKKEGSA KRATPILSETKSTLSAFSAPQNSSESQTHVSGGGNDSSGPTVWYHETLEWLKPEKRRDEHRRRPHDPDFDASTLYVPE  
\* \* \* \* \* \* \* \* \* \* \* \* \* \* \* \* \* \* \* \*

Human: 401-DFLNSTCPGMRKWWQIKSQNFDLVICYKVGKFYELYHMDALIGVSELGIVFMKGNWAHSGFPEIAFGFRYSDSLVQKGYKVARVEQTETPEMMEARCRKMA  
Mouse: 400-EFLNSTCPGMRKWWQLKSNFDLVIFYKVGKFYELYHMDAVIGVSELGIVFMKGNWAHSGFPEIAFGFRYSDSLVQKGYKVARVEQTETPEMMEARCRKMA  
\* \* \* \* \* \* \* \* \* \* \* \* \* \* \* \* \* \* \*

Human: 501-HISKYDRVVRREICRIITKGTQTYSVLEGDPSENYSKYLLSLKEKEEDSSGHTRAYGVCFVDTSLGKFFIGQFSDDRHCSRFRTLVAHYPPVQVLFEKGN  
Mouse: 500-HVSKFDRVVRREICRIITKGTQTYSVLDGDPSENYSRYLLSLKEKEEETSGHTRVYGVCFVDTSLGKFFIGQFSDDRHCSRFRTLVAHYPPVQILFEKGN  
\* \* \* \* \* \* \* \* \* \* \* \* \* \* \* \* \* \* \*

Human: 601-LSKETKTILKSSLSCSLQEGLIPGSQFWDASKTLRLLLEEEYFREKLSDGIGVMLPQVLKGMTSESDSIGLTPGEKSELALSALGICV FYLKKCLIDQEL  
Mouse: 600-LSTETKTIVLKGSLSSCLQEGLIPGSQFWDATKTLRLLLEGGYFTG NGDSSTVLPVLKGMTSESDSVGLTPGEESELALSALGIV FYLKKCLIDQEL  
\* \* \* \* \* \* \* \* \* \* \* \* \* \* \* \* \* \* \* \*

Human: 701-LSMANFEYYIPLDSDTVSTTRSGAIFTKAYQRMVLDVTLNLEIFLNGTNGSTEGTLLERVDTCHTPFGKRLKQWLCAPLCNHYAINDRLDAIEDLMV  
Mouse: 698-LSMANFEYYFPLDSDTVSTVKPQAVFTKASQRMVLDVTLNLEIFLNGTNGSTEGTLLERLDTCHTPFGKRLKQWLCAPLCSPSAISDRDLDAVEDLMA  
\* \* \* \* \* \* \* \* \* \* \* \* \* \* \* \* \* \* \* \*

Human: 801-VPDKISEVVELLKLLPDLERLLSKIHNVGSPKSNQHPDSRAIMYEETTYSKKKIIDFLSALEGFKVMCKIIGIMEEYADGFKSKILKQVISLQTKNPEG  
Mouse: 798-VPDKVTEVADLLKLLPDLERLLSKIHNVGSPKSNQHPDSRAIMYEETTYSKKKIIDFLSALEGFKVMCKVSGLEEYAGGFTSKTLKQVVTLSQSKSPKG  
\* \* \* \* \* \* \* \* \* \* \* \* \* \* \* \* \* \* \* \*

Human: 901-RFPDLTVELNRWDTAFDHEKARKTKGLITPKAGFSDYDQALADIRENEQSLEYLEKQRNRIGCRTIVYWGIGRNRNYQLEIIPENFTTRNLPEEYELKSTK  
Mouse: 898-RFPDLTAEQRWDTAFDHEKARKTKGLITPKAGFSDYDQALADIRENEQSLEYLKQSRGCKSIYVWGIGRNRNYQLEIIPENFATRNLPEEYELKSTK  
\* \* \* \* \* \* \* \* \* \* \* \* \* \* \* \* \* \* \* \*

Human: 1001-KGCKRYWTKTIEKKLANLINAERRDVSLKDCMRLFYNFKNYKDWQSAVECIAVLDVLLCLANYSRGGDGPMCRPVILLP EDTPFLELKGSRHPCIT
