# Supplementary material for: Suspected Lynch syndrome associated MSH6 variants: A functional assay to determine their pathogenicity
Source: PubMed Central journal article supplement (PMC5460888; doi:10.1371/journal.pgen.1006765), 2017-05-22

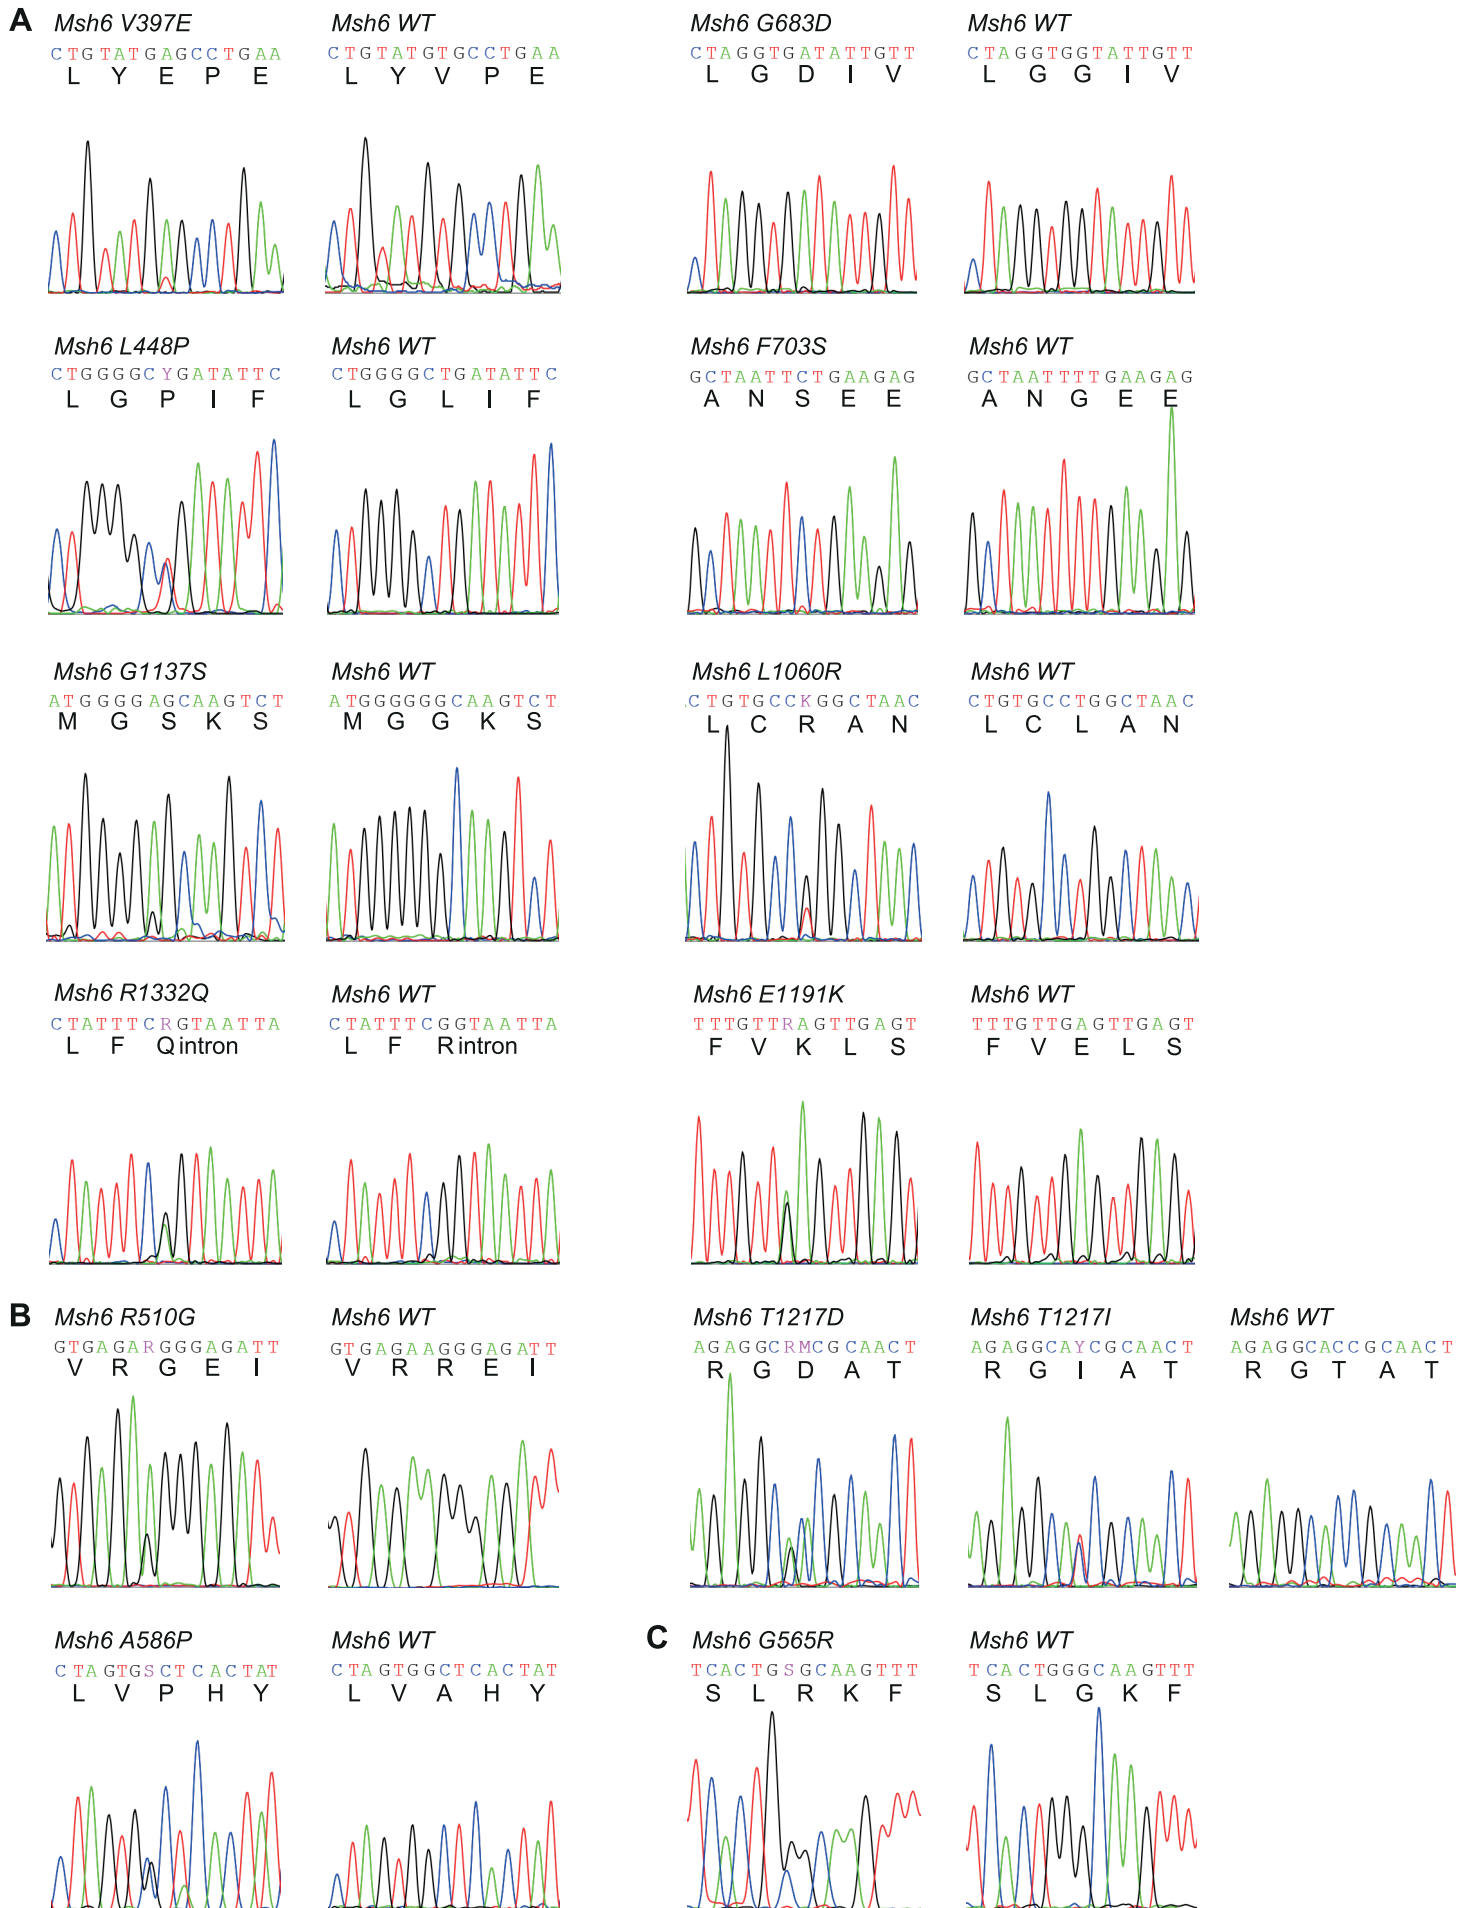

Supplement: pgen.1006765.s002.pdf [file pgen.1006765.s002.pdf]
