# Supplementary material for: Suspected Lynch syndrome associated MSH6 variants: A functional assay to determine their pathogenicity
Source: PubMed Central journal article supplement (PMC5460888; doi:10.1371/journal.pgen.1006765), 2017-05-22
Supplement: pgen.1006765.s003.pdf [file pgen.1006765.s003.pdf]

Detected (Pathogenic)

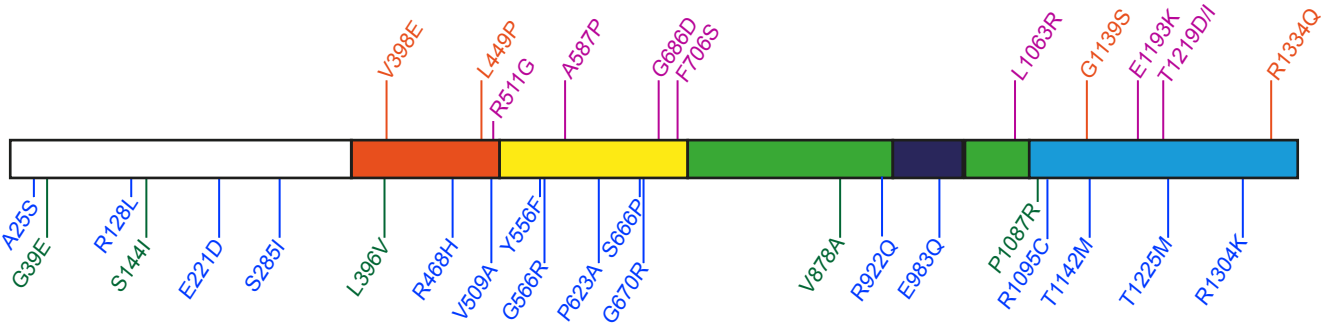

Undetected (Non-pathogenic)

- Mismatch binding domain (aa 362-518)
- Connector domain (aa 519-717)
- Lever domain (aa 718-934 and 1009-1076)
- Clamp domain (aa 935-1008)
- ATPase domain (aa 1077-1360)
