# Supplementary material for: Suspected Lynch syndrome associated MSH6 variants: A functional assay to determine their pathogenicity
Source: PubMed Central journal article supplement (PMC5460888; doi:10.1371/journal.pgen.1006765), 2017-05-22
Supplement: pgen.1006765.s004.pdf [file pgen.1006765.s004.pdf]

Human amino acid sequence: M G G K S T L M R Q INTRON  
Human DNA sequence: ATGGGGGCAAGTCTACGCTTATGAGACAGGTAACGATTCTTAA  
Mouse DNA sequence: ATGGGGGCAAGTCTACACTCATAAGACAGGTAATTGTTCTTCA  
Mouse amino acid sequence: M G G K S T L I R Q INTRON
